# Supplementary material for: Determination of Microplastics in Omega-3 Oil Supplements
Source: Preprints.org preprint supplement (doi:10.20944/preprints202404.0185.v1), 2024-04-02
Supplement: Supplementary file 1 [file supplementary]

**Supplementary Materials**

Determination of Microplastics in Omega-3 oil supplements

Moonhae Kim1,2,†, Juyang Kim2,†, Seulah Park2, Dowoon Kim2, Jaehak Jung2,*,‡ and Dongha Cho1,*,‡

1 Department of Bio-Health Convergence, College of Biomedical Science, Kangwon National University, Chuncheon 24341, Korea

2 Korea Institute of Analytical Science and Technology, Seoul 04790, Korea

***** Correspondence: jh3370@naver.com (J.J.); chodh@kangwon.ac.kr (D.C.)

† These authors contributed equally to this work.

‡ These authors contributed equally to this work.

Supplementary Results


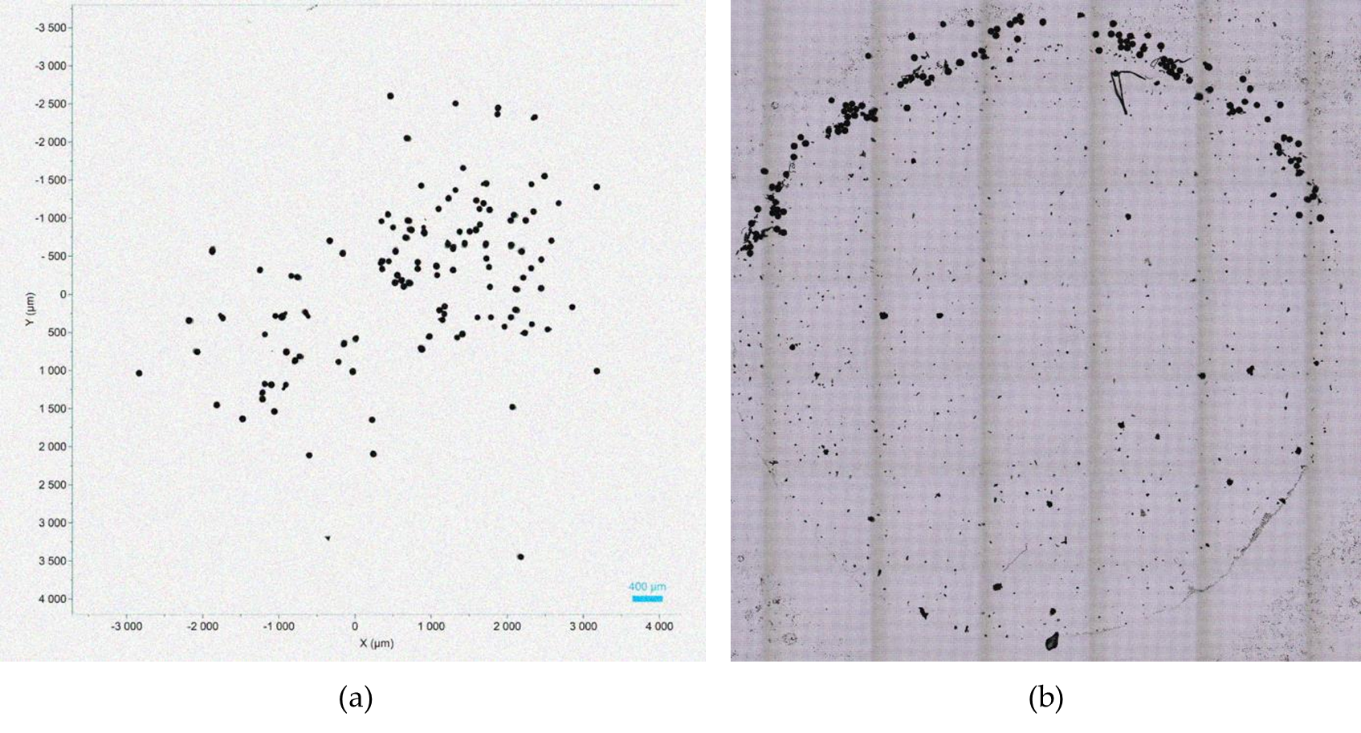


**Figure S1**. PE spheres used for recovery test: (a)before addition; (b) recovered PE spheres on filter.


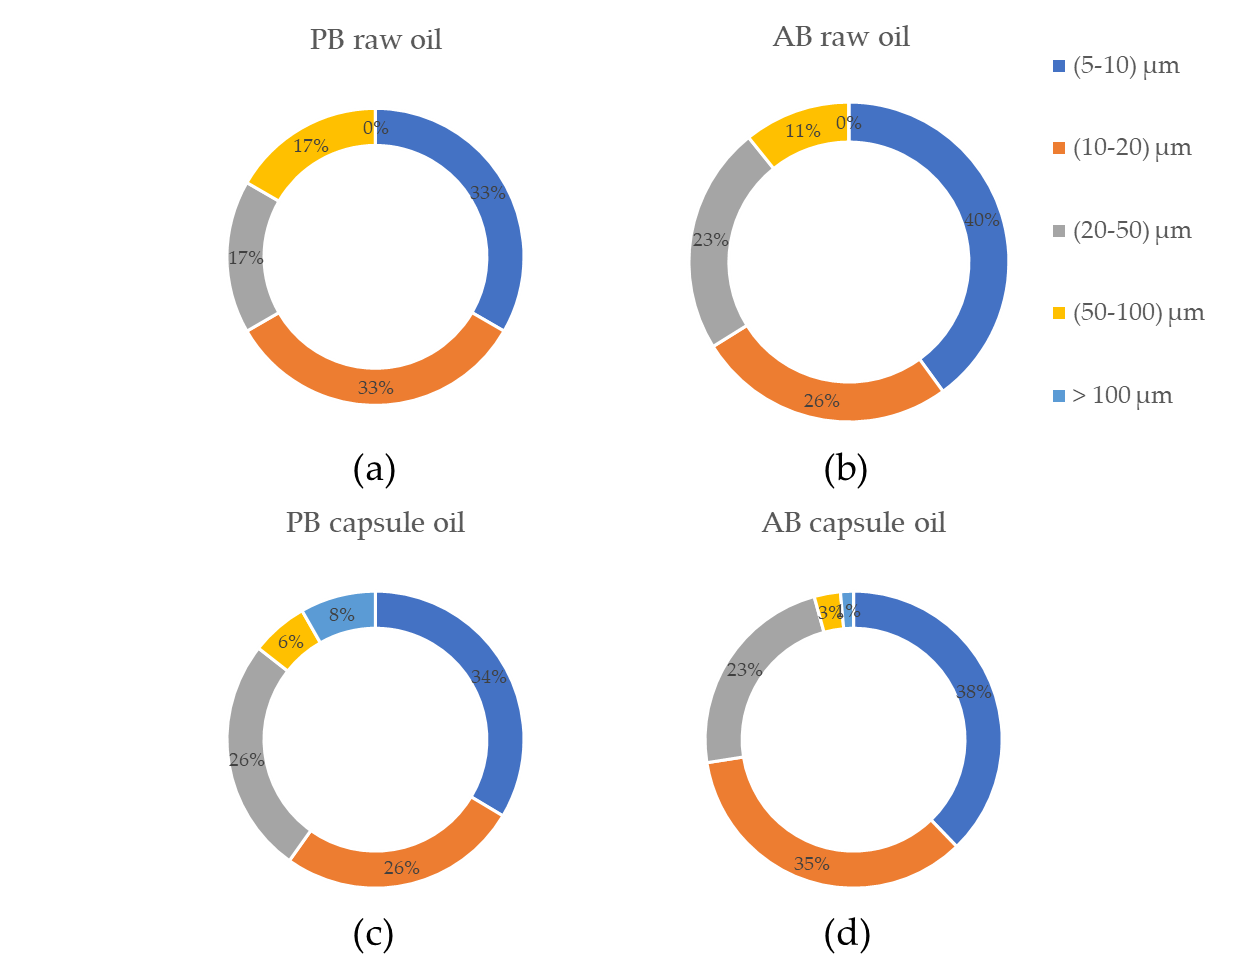


**Figure S2**. Distribution by polymer size of: (a) PB raw oil; (b) PB capsule oil; (c) AB raw oil; (d) AB capsule oil.

**Table S1.** Numbers of MPs in omega-3 samples

| Sample type | Based oil | Total number of MPs | Composition of MPs | Amount of sample (g) |
| --- | --- | --- | --- | --- |
| Raw oil | PB | 6 | 3 PP, 1 PS, 2 PET | 2.5 |
| Raw oil | PB | 0 | N.D.* | 2.5 |
| Raw oil | AB | 7 | 7 PP | 2.5 |
| Raw oil | AB | 6 | 5 PP, 1 PET | 2.5 |
| Raw oil | AB | 1 | 1 PP | 2.5 |
| Raw oil | AB | 10 | 8 PP, 1 PS, 1 PET | 2.5 |
| Raw oil | AB | 2 | 2 PP | 2.5 |
| Raw oil | AB | 7 | 7 PP | 2.5 |
| Raw oil | AB | 2 | 2 PP | 2.5 |
| Raw oil | AB | 2 | 1 PE, 1 PET | 2.5 |
| Raw oil | AB | 3 | 3 PP | 2.5 |
| Raw oil | AB | 14 | 14 PP | 2.5 |
| Raw oil | AB | 8 | 5 PP, 3 PET | 2.5 |
| Raw oil | AB | 1 | 1 PP | 2.5 |
| Capsule oil | PB | 34 | 17, PP, 16 PET, 1 PVC | 2.9 |
| Capsule oil | PB | 7 | 7 PP | 1.4 |
| Capsule oil | PB | 4 | 3 PP, 1 PVC | 2.7 |
| Capsule oil | PB | 5 | 1 PE, 4 PET | 2.2 |
| Capsule oil | PB | 0 | N.D. | 3.0 |
| Capsule oil | PB | 8 | 4 PP, 1 PE, 3 PET | 3.0 |
| Capsule oil | PB | 5 | 1 PP, 4 PET | 3.0 |
| Capsule oil | AB | 0 | N.D. | 3.0 |
| Capsule oil | AB | 13 | 8 PP, 3 PET, 2 PMMA | 2.1 |
| Capsule oil | AB | 9 | 8 PP, 1 PS | 2.1 |
| Capsule oil | AB | 11 | 10 PP, 1 PMMA | 1.1 |
| Capsule oil | AB | 8 | 8 PP | 1.1 |
| Capsule oil | AB | 17 | 7 PP, 10 PET | 2.5 |
| Capsule oil | AB | 73 | 53 PP, 20 PET | 2.4 |
| Capsule oil | AB | 44 | 6 PP, 34 PET, 4 PVC | 2.8 |
| Capsule oil | AB | 52 | 21 PP, 31 PET | 2.7 |
| Capsule oil | AB | 18 | 8 PP, 10 PET | 0.8 |
| Capsule oil | AB | 34 | 26 PP, 8 PE | 2.2 |
| Capsule oil | AB | 0 | N.D. | 1.1 |
| Capsule oil | AB | 8 | 5 PP, 3 PET | 1.1 |
| Capsule oil | AB | 3 | 2 PP, 1 PET | 1.0 |
| Raw oil | PB | 6 | 3 PP, 1 PS, 2 PET | 2.5 |

*N.D. : Not Detected.
